# New and Essential Geriatric Psychiatry Titles

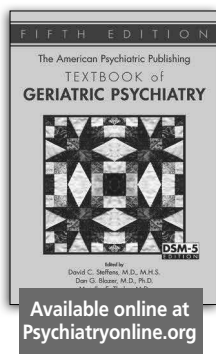

## The American Psychiatric Publishing Textbook of Geriatric Psychiatry, Fifth Edition

*Edited by David C. Steffens, M.D., M.H.S., Dan G. Blazer, M.D., Ph.D., and Mugdha E. Thakur, M.D.*

This Fifth Edition an indispensable resource for psychiatric clinicians and trainees charged with assessing, diagnosing, and treating mental disorders. Building on the prodigious strengths of previous editions, this revision is the most current, comprehensive, and systematic textbook of geriatric psychiatry available today, and the only one that is DSM-5® concordant.

Widely recognized as the standard in its field, the book serves a critical need for clinicians challenged to meet the mental health needs of an aging population.

2015 • 837 pages • ISBN 978-1-58562-484-3 • Hardcover • \$192.00 • Item #62484

2015 • 837 pages • ISBN 978-1-58562-522-2 • eBook • \$154.00 • Item #62522

2015 • 12 Month Subscription • Online at Psychiatryonline.org • \$166.00 • Item #537005

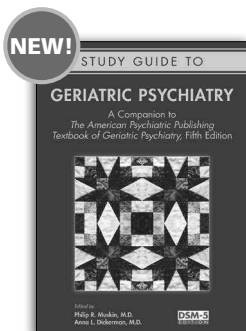

## Study Guide to Geriatric Psychiatry

A Companion to The American Psychiatric Publishing Textbook of Geriatric Psychiatry, Fifth Edition

*Philip R. Muskin, M.D., and Anna L. Dickerman, M.D.*

*Study Guide to Geriatric Psychiatry* is a question-and-answer companion that allows you to evaluate your mastery of the subject matter as you progress through *The American Psychiatric Publishing Textbook of Geriatric Psychiatry*, Fifth Edition. The *Study Guide* is made up of approximately 255 questions divided into 25 individual quizzes that correspond to chapters in the textbook. Questions are followed by an answer guide that references relevant text in the textbook. Each answer is accompanied by a discussion that addresses the correct response and also explains why other responses are not correct.

2017 • 352 pages • ISBN 978-1-61537-045-0 • Paperback • \$62.00 • Item #37045

2017 • 352 pages • ISBN 978-1-61537-106-8 • eBook • \$49.95 • Item #37106

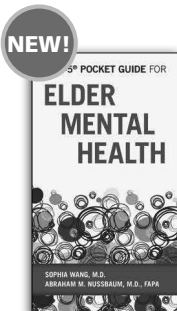

## DSM-5® Pocket Guide for Elder Mental Health

*Sophia Wang, M.D., and Abraham M. Nussbaum, M.D., FAPA*

The *DSM-5 Pocket Guide for Elder Mental Health* is an easily understandable tool for psychiatric and non-psychiatric professionals. It captures the essence of geriatric principles including care coordination, functional status, and the well-being of the caregiver as well as the patient in the context of well-crafted case scenarios. Drs. Wang and Nussbaum have truly operationalized the DSM-5 for geriatric providers and patients.

2017 • 375 pages • ISBN 978-1-61537-056-6 • Paperback • \$65.00 • Item #37056

2017 • 375 pages • ISBN 978-1-61537-119-8 • eBook • \$52.00 • Item #37119

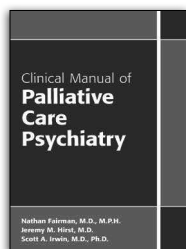

## Clinical Manual of Palliative Care Psychiatry

*Nathan Fairman, M.D., M.P.H., Jeremy M. Hirst, M.D., and Scott A. Irwin, M.D., Ph.D.*

The book seeks to bridge the gulf between principles and practice for two groups of clinicians: front-line palliative care providers with little mental health training and mental health specialists who may lack familiarity with palliative care practice. The book reviews palliative care principles and practice models, treatment of the psychiatric symptoms most commonly encountered in palliative care settings.

2016 • 297 pages • ISBN 978-1-58562-476-8 Paperback • \$61.00 • Item #62476

2016 • 297 pages • ISBN 978-1-61537-061-0 • eBook • \$48.95 • Item #37061

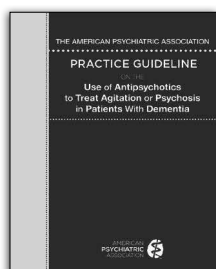

## The American Psychiatric Association Practice Guideline on the Use of Antipsychotics to Treat Agitation or Psychosis in Patients With Dementia

*American Psychiatric Association*

The guideline offers clear, concise, and actionable recommendation statements to help clinicians to incorporate recommendations into clinical practice, with the goal of improving quality of care. Each recommendation is given a rating that reflects the level of confidence that potential benefits of an intervention outweigh potential harms.

2016 • 218 pages • ISBN 978-0-89042-677-7 • Paperback • \$65.00 • Item #2677

2016 • 218 pages • ISBN 978-0-89042-678-4 • eBook • \$52.00 • Item #2678

**ASSISTANT/ASSOCIATE PROFESSOR  
UNIVERSITY OF NORTH CAROLINA AT CHAPEL HILL**

The Department of Psychiatry at the University of North Carolina at Chapel Hill is seeking an MD, MD/PhD, or PhD at the Assistant/Associate Professor level to develop a research program in health services, health quality and/or outcomes within the UNC Center for Excellence in Community Mental Health (<http://www.med.unc.edu/psych/cecmh>). The Center provides a continuum of multi-disciplinary, recovery-based care to persons with serious mental illness in central North Carolina. The successful candidate will develop an independent research program, participate in multi-disciplinary collaboration across the Center, and provide mentorship for trainees.

Please apply at  
<http://unc.peopleadmin.com/postings/112416>

Questions should be directed to  
**John Gilmore, MD, Director of the UNC CECMH**  
at [jgilmore@med.unc.edu](mailto:jgilmore@med.unc.edu)

**EOE**



**UNMATCHED GROWTH  
OPPORTUNITIES**

Los Angeles County has immediate openings with Antelope Valley, Correctional Health Services, Juvenile Halls and Probation Camps, and directly operated programs. This is your chance to join the leading mental health agency in the nation and work in a safe, diverse, and challenging environment. The County is filled with opportunities for professional development and growth, and is expanding exponentially with new full-time psychiatrist positions. We offer competitive starting salaries and benefits with potential bonuses up to \$30,000\* a year. The County allows up to 24 hours a week for outside employment. Some positions qualify for loan forgiveness.

**Joseph Simpson, M.D.**  
Supervising Psychiatrist,  
Correctional Health Services



**LAC DMH**  
LOS ANGELES COUNTY  
DEPARTMENT OF  
MENTAL HEALTH

[www.psychiatristjobs.la](http://www.psychiatristjobs.la)

\*Depending on qualifications and placement.

**Marcia Mshewa, M.D.**  
Psychiatrist, Correctional Health Services

"Correctional Health Services provides an excellent foundation to build your career. You have a lot of freedom to set your own parameters. We have a large supportive team and we bounce ideas off each other."

"What attracted me to this opportunity was the flexibility to practice in so many settings. If you want a change in treatment settings or a change of patient population, you can do that all within the same employer, and that employer is DMH."

**Psychiatric Services** (ISSN 1075-2730; online version, 1557-9700) is published monthly by the American Psychiatric Association, editorial and executive office, 1000 Wilson Blvd., Suite 1825, Arlington, VA 22209-3901. Copyright © 2016 by the American Psychiatric Association. Printed in U.S.A. Periodicals postage paid at Arlington, VA, and at additional mailing offices. POSTMASTER: Send address changes to **Psychiatric Services, 1000 Wilson Blvd., Suite 1825, Arlington, VA 22209-3901.**

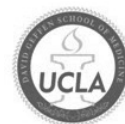

**David Geffen**  
School of Medicine

**Senior Faculty Position in Mental Health Services Research**

The Semel Institute for Neurosciences and Human Behavior at UCLA, in conjunction with the UCLA Department of Psychiatry and Biobehavioral Sciences of the David Geffen School of Medicine, is seeking applicants for a full-time tenure-track senior faculty position in Mental Health Services Research. The successful candidate will be expected to lead and strengthen research programs within the Center. Excellent teaching and mentoring skills are required, as is a track record of experience and commitment to community engagement, research methods, and health services research. An M.D. and an established academic background in Psychiatry, Psychology, Sociology and/or Public Health are required.

For more information and to apply,  
please refer to the online posting at  
<https://recruit.apo.ucla.edu/apply/JPF02381>.

*UCLA is an EO/AA Employer.*

# psychiatryonline.org

Your Destination for Lifelong Learning in Psychiatry

Your one-stop resource for information on diagnosis, treatment, guidelines, the latest research, and breaking news from the field.

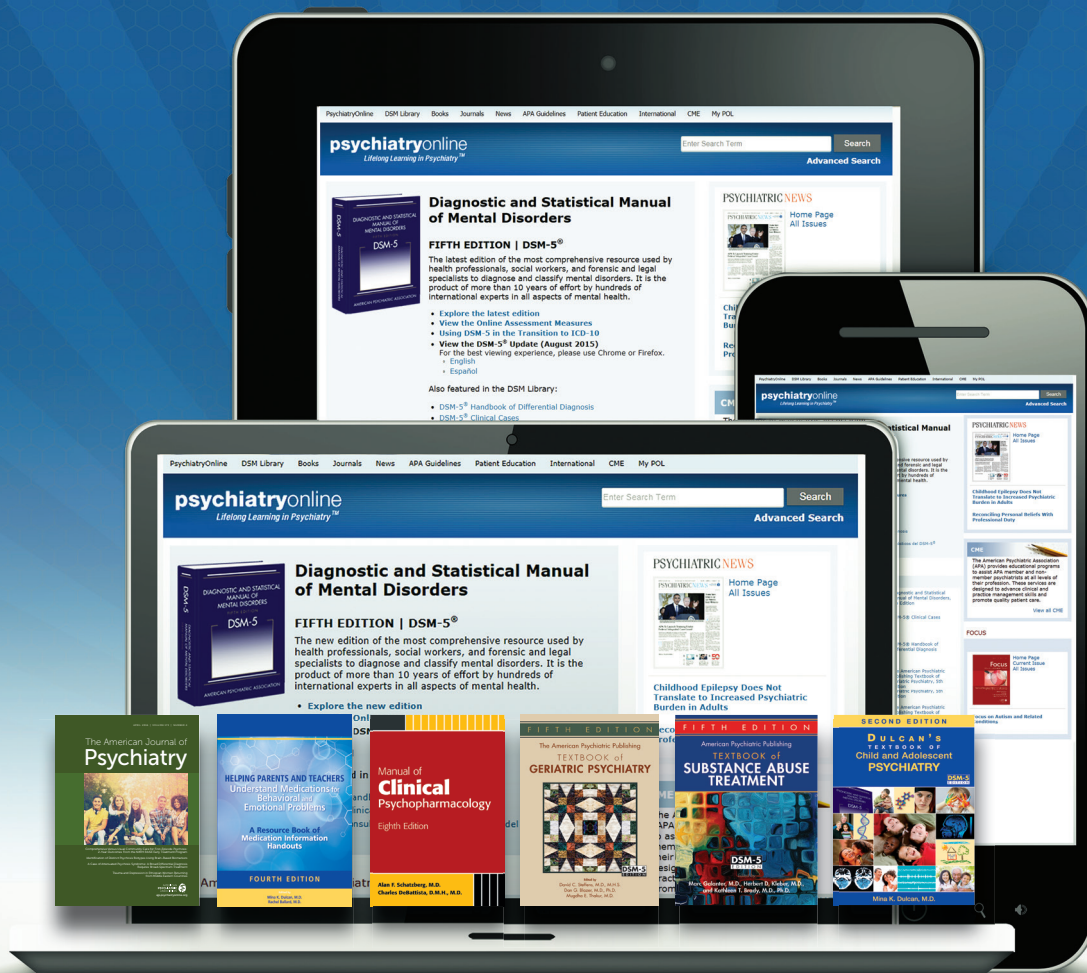

Subscribe to products individually or to the DSM Select package that includes the DSM-5® library, books and select journals.

Go to [www.appi.org](http://www.appi.org) to subscribe.

Institutional subscription options are available.

For more information contact: [institutions@psych.org](mailto:institutions@psych.org); 800-368-5777 ext. 7874

AMERICAN  
PSYCHIATRIC  
ASSOCIATION  
PUBLISHING

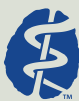

[www.appi.org](http://www.appi.org) • 1-800-368-5777 • [appi@psych.org](mailto:appi@psych.org)

AH1703A
