# Psychiatric Services

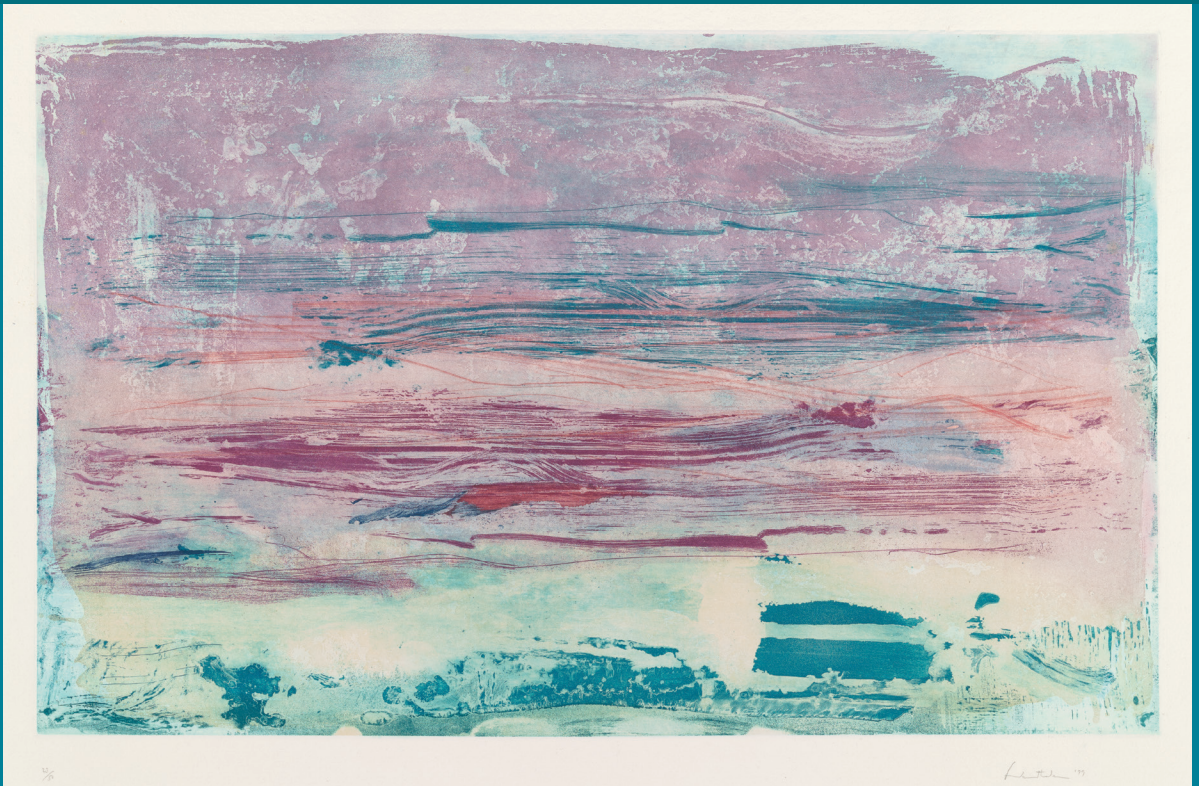

Using the ACT model to improve general medical outcomes,  
reduce treatment costs, and increase access

How inpatient psychiatric care measures up to Joint Commission  
standards in VA and other hospitals

Community-based peer navigators helping others improve health and recovery
