# Essential Titles for Mental Health Professionals

## Clinical Manual of Palliative Care Psychiatry

Nathan Fairman, M.D., M.P.H., Jeremy M. Hirst, M.D., and  
Scott A. Irwin, M.D., Ph.D.

Psychiatrists and residents are faced with the task of refreshing their In recent years, palliative care has emerged as the leading model of person-centered care focused on preserving quality of life and alleviating distress for people and families experiencing serious and life-limiting medical illness. Alongside this development has come a growing recognition of the need for expertise in psychiatric diagnosis, psychopharmacology, and psychotherapy within the interdisciplinary team of specialists tasked with identifying and addressing the varied sources of suffering in patients with advanced medical illnesses. The *Clinical Manual of Palliative Care Psychiatry* was written to motivate and guide readers—whether mental health clinicians or palliative care providers—to deepen their understanding of the psychosocial dimensions of suffering for the benefit of seriously ill patients and the support of their families.

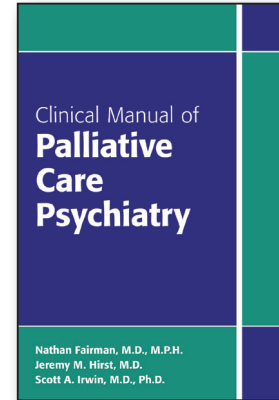

2016 • 304 pages • ISBN 978-1-58562-476-8 • Paperback • \$61.00 • Item #62476

2016 • 304 pages • ISBN 978-1-61537-061-0 • eBook • \$48.95 • Item #37061

## People With Mental Illness in the Criminal Justice System

### Answering a Cry for Help

Group for the Advancement of Psychiatry  
Committee on Psychiatry and the Community

Written by a committee of the Group for the Advancement of Psychiatry, *People With Mental Illness in the Criminal Justice System: Answering A Cry for Help* represents the collective wisdom of leaders in community psychiatry and is the third in a series of successful publications that have used Dear Abby letters as source material. The letters, submitted by readers with experience with mental illness and the criminal justice system, constitute a rich, real-world repository for the case stories presented in this fascinating volume. Using the experiences shared in the letters, the authors employ the Sequential Intercept Model to present a series of chapters offering detailed recommendations for psychiatrists, group practices, and criminal justice entities on partnering with individuals who are at risk and their families, with the goal of improving outcomes.

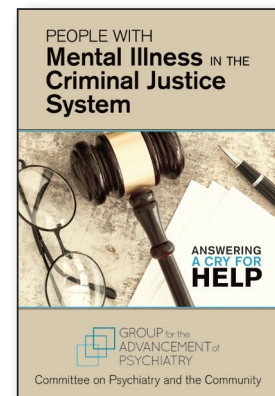

This book can potentially reduce the overrepresentation of people with mental illnesses in justice settings, provide alternatives to incarceration, and divert individuals who do not pose a public safety risk from jail.

2016 • 175 pages • ISBN 978-0-87318-219-5 • Paperback • \$31.50 • Item #7219

2016 • 175 pages • ISBN 978-0-87318-220-1 • eBook • \$25.00 • Item #7220

AMERICAN  
PSYCHIATRIC  
ASSOCIATION  
PUBLISHING

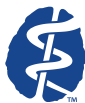

[www.appi.org](http://www.appi.org)

Email: [appi@psych.org](mailto:appi@psych.org)

Toll Free: 1-800-368-5777

20% Discount for American Psychiatric Association Members

25% Discount for APA Resident-Fellow Members

Please use Priority Code AH1711A when ordering.

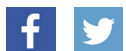

Source: https://psychiatryonline.org/doi/suppl/10.1176/ps.2017.68.issue-3/suppl_file/front.pdf
